# Supplementary material
Source: publisher figshare collection journal article supplement (https://gsapubs.figshare.com/ndownloader/files/23300933)
Supplement: Supplementary file 1 [file 23300933]

GSA Data Repository 2016146

# Seismic interpretation of crustal-scale extension in the Intermontane Belt of the northern Canadian Cordillera

Andrew J. Calvert

## Supplementary Figures

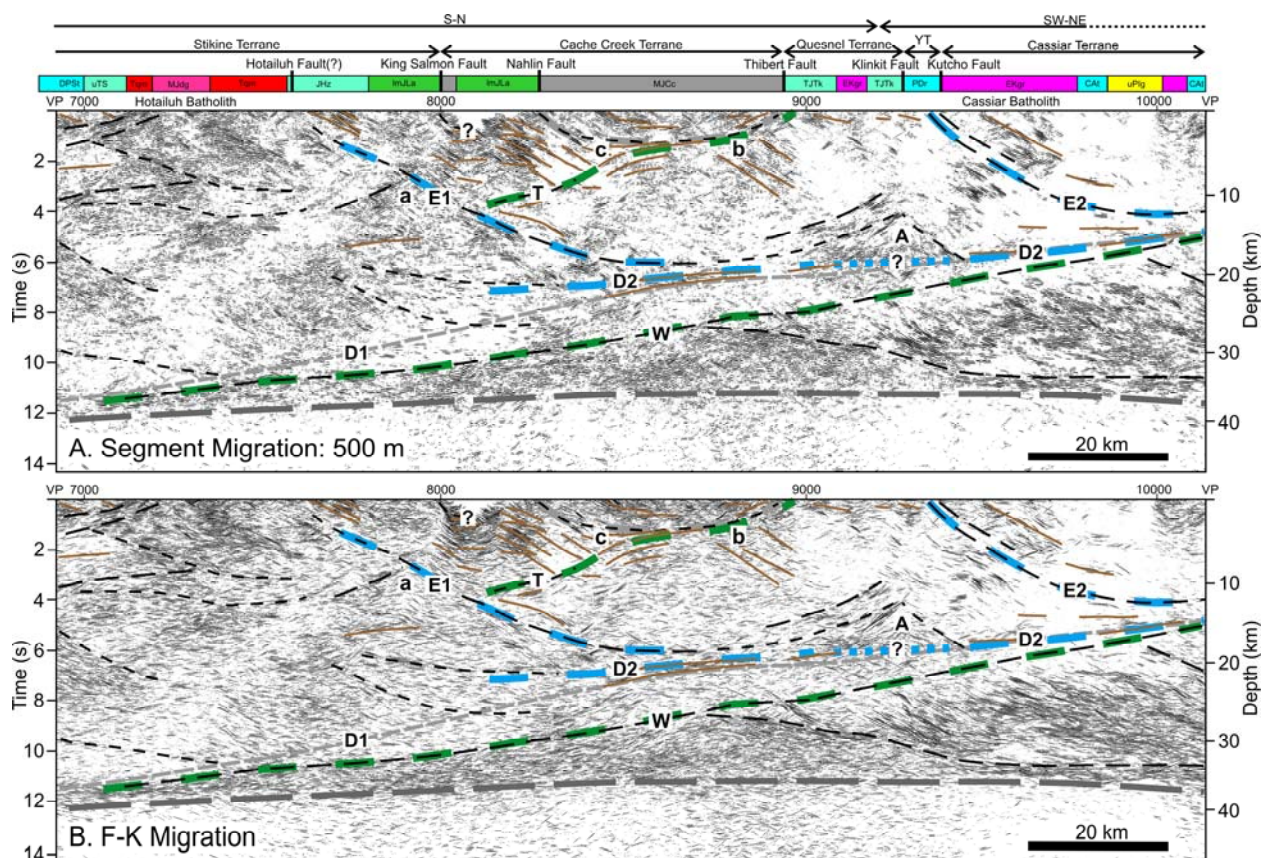

Figure DR1: Additional displays of Figure 2 with interpretation: A. Segment migration derived using a lateral smoothing of 500 m, as in Figure 2. B. F-K wave equation migration with subsequent coherency filtering for display.

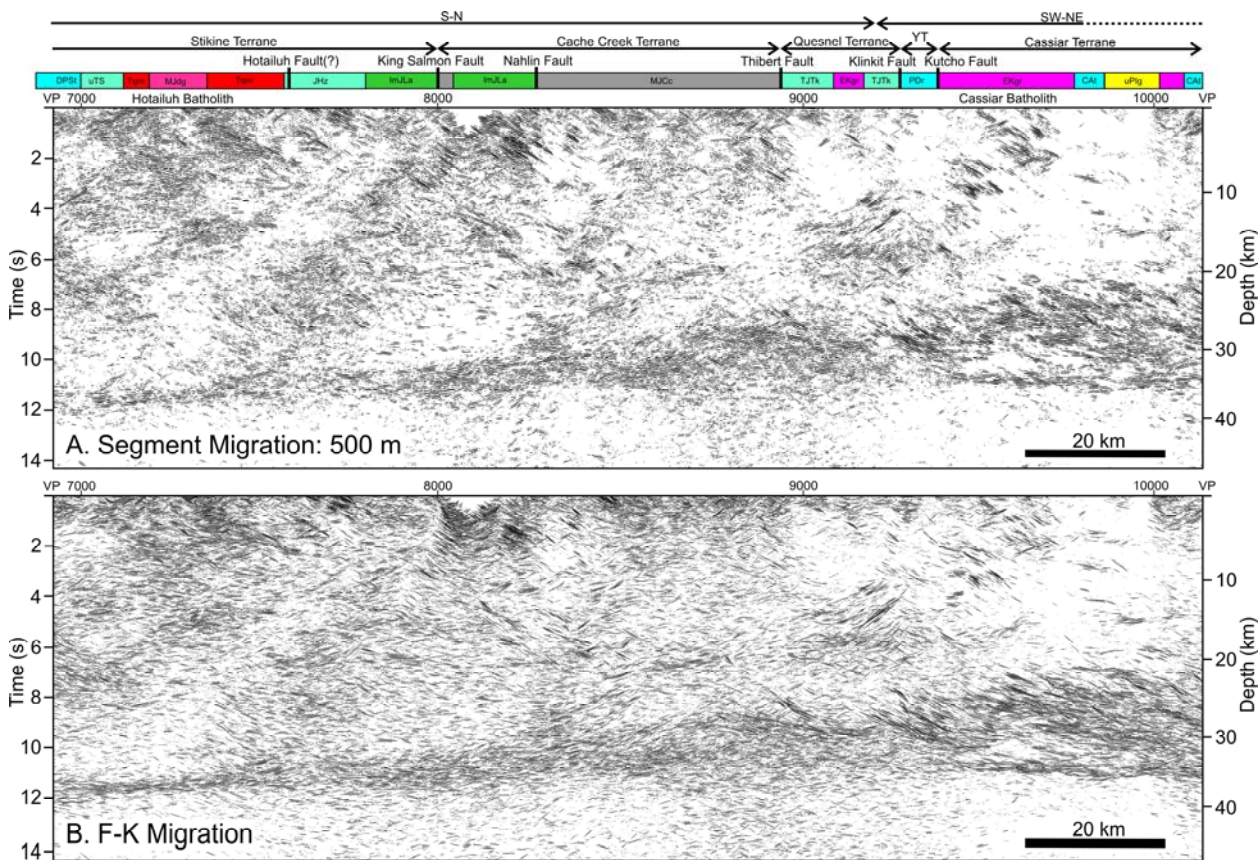

Figure DR2: Additional displays of Figure 2 without interpretation: A. Segment migration derived using a lateral smoothing of 500 m, as in Figure 2. B. F-K wave equation migration with subsequent coherency filtering for display.
